# Supplementary material
Source: Springer Nature journal article supplement (https://www.springermedizin.de/resource/supplementary/12889_2014_7250_MOESM6_ESM.pdf/9497196)

**A**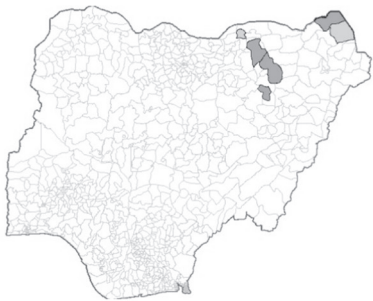**B**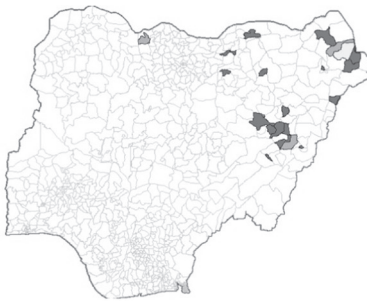**C**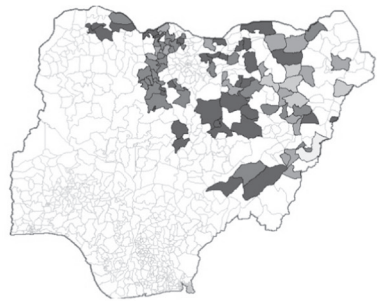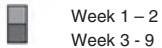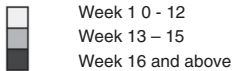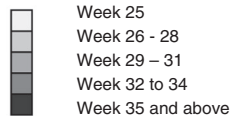

Supplement: MOESM6 [file 9497196]
